# Supplementary material
Source: PubMed Central journal article supplement (PMC4702641)
Supplement: AEM.02772-15_zam999116811so1.pdf [file AEM.02772-15_zam999116811so1.pdf]

1 **Supplemental Materials**

2 **TABLE S1** Higher fungi/bacteria ratio and percent of AMF fungi are in rhizosphere sample (M1)  
3 than bulk sample (SB1).

|         | % Bacteria | % Fungi | % AMF in Fungi | Fungi/Bacteria |
|---------|------------|---------|----------------|----------------|
| SB1-SSU | 97.00%     | 0.36%   | 0.00%          | 0.0037         |
| SB1-LSU | 96.75%     | 0.42%   | 0.00%          | 0.0044         |
| M1-SSU  | 92.38%     | 2.60%   | 0.18%          | 0.0281         |
| M1-LSU  | 92.94%     | 2.48%   | 0.18%          | 0.0267         |

4  
5  
6  
7  
8  
9  
10  
11  
12  
13

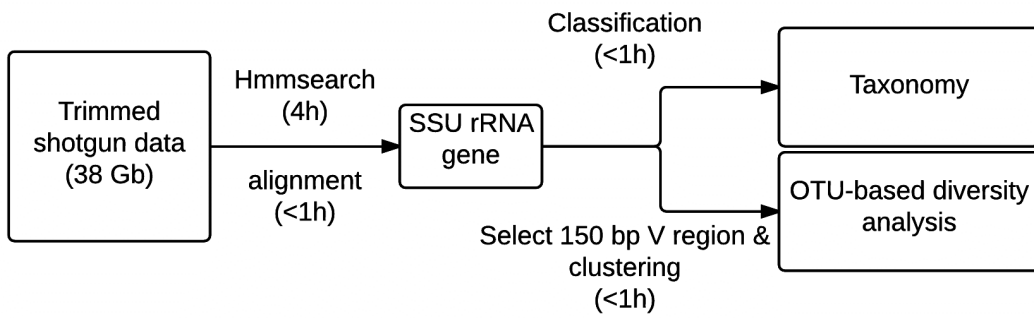

14

15 **FIG S1** Flowchart of SSUsearch pipeline. SSU rRNA gene fragments were retrieved by an  
16 hmmsearch and alignment step, which could be further used for reference-based (supervised)  
17 diversity analysis (taxonomy). Those fragments aligned to 150 bp of a variable region could be  
18 used for OTU-based (unsupervised) diversity analysis. SSU rRNA gene identification  
19 hmmsearch is the most time consuming steps. For 1 lane of trimmed HiSeq data (38 Gb) from  
20 Miscanthus rhizosphere sample (M1), SSU rRNA gene identification took about 4 hours with  
21 peak memory usage of about 4.5 Gb. In the analysis pipeline, where there was not a clear  
22 performance difference between tools, we mostly used Mothur including databases. For (de  
23 novo) OTU based analysis, SSU rRNA gene reference sequences with taxonomy information are  
24 required for classification. Another smaller set of aligned references is required to align the gene  
25 fragments from shotgun data. The SILVA database (the official one, not the one included with  
26 QIIME or Mothur) was used to build the HMM since the reference set from SILVA was more up  
27 to date. Two scripts in QIIME were used to cluster (UCLUST, the default) and pick  
28 representative sequences. Building the HMM is not part of the pipeline but using the built HMM  
29 is. We found that complete-linkage clustering is faster and requires less memory with McClust  
30 than with Mothur (dist.seqs and cluster). Additionally, we use two scripts in QIIME  
31 (pick\_otus.py and pick\_rep\_set.py) to select representative sequences for building the HMM due  
32 to ease of use and the GreenGenes database is included for use with the Copyrighter copy number  
33 correction tool.

34  
35

36

37

38

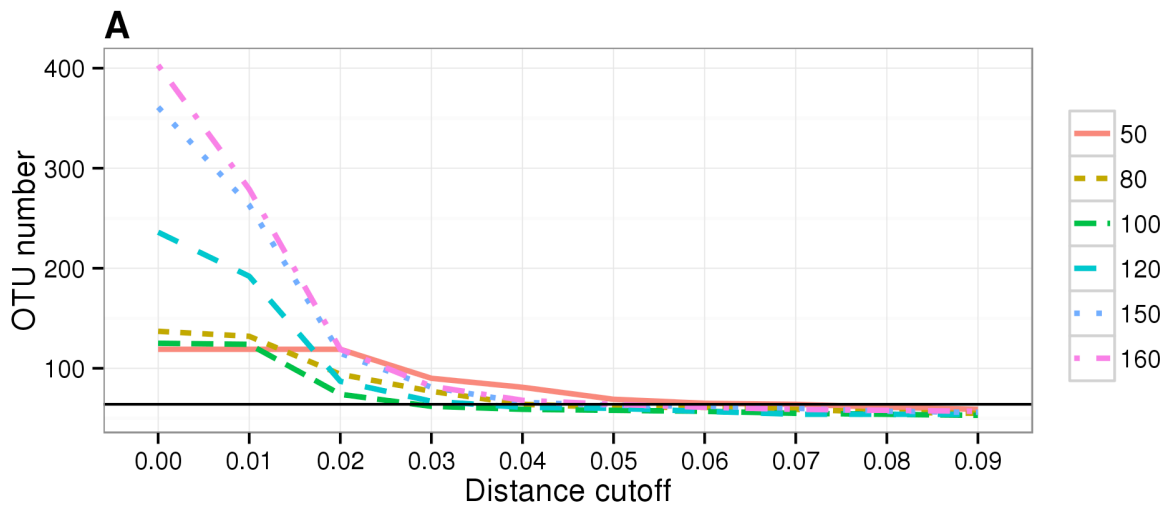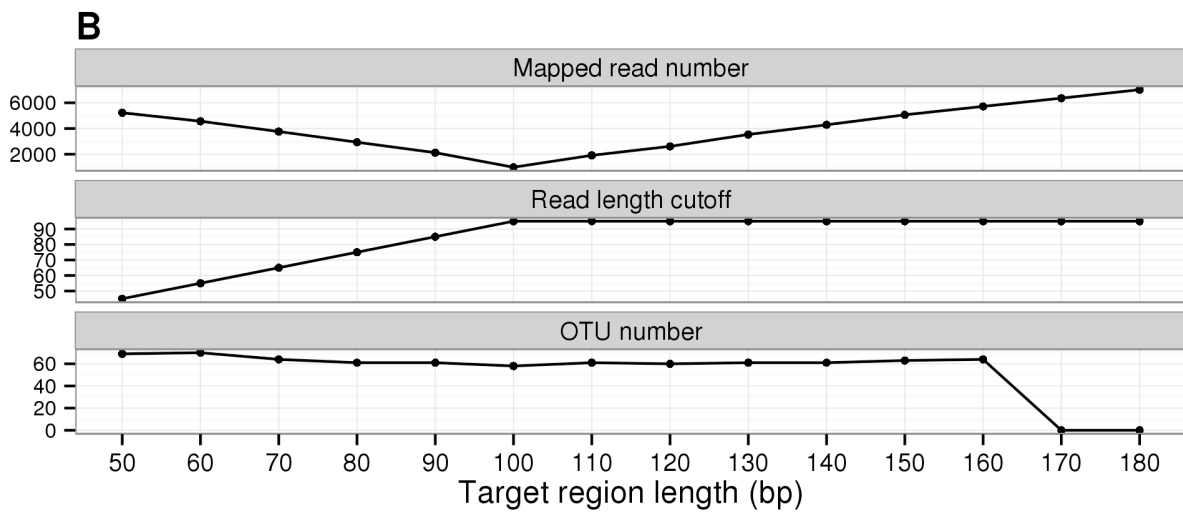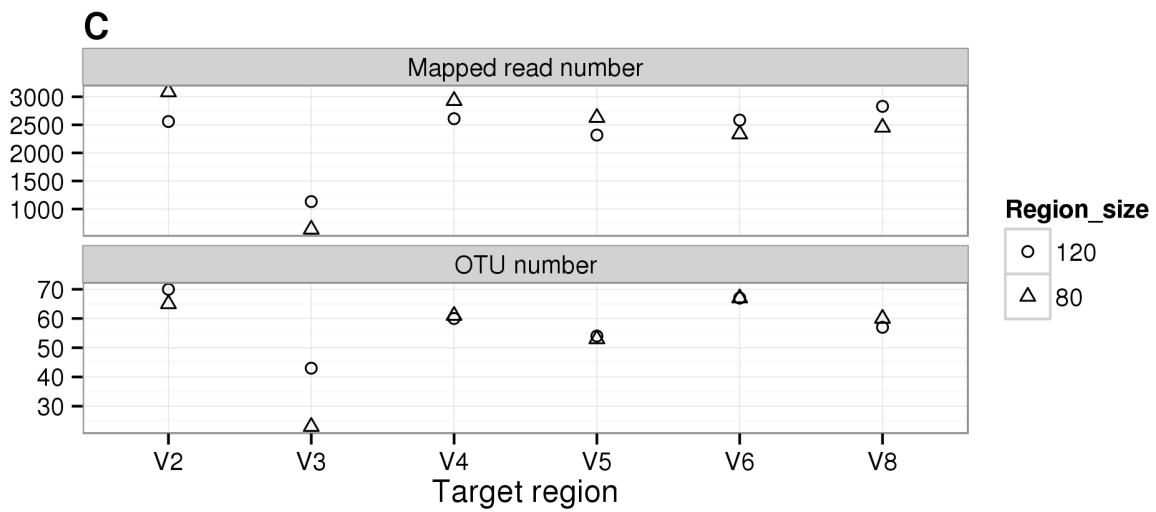

40 **FIG S2** Testing the effect of target region size and variable region on clustering on a synthetic  
41 community with 64 species with read length at about 100 bp. Subfigure A shows a distance  
42 cutoff of 4% or 5% is proper for all regions sizes from 50 bp to 160 bp in V4 (OTU number  
43 approached the species number 64 as indicated by the black line). Subfigure B shows more  
44 details in the method used for subfigure A. Panel “Read Length cutoff” in B shows minimum  
45 read length was set to the target region size minus 5 bp if the region size was less than 100 bp,  
46 and 95 bp when the region size was longer than 100 bp. As a result, the number of reads aligned  
47 decreased as the target region size increased until 100 bp, and then the number of reads aligned  
48 increased with target region as shown in Panel “Mapped read number” in B. Panel “OTU  
49 number” in C shows OTU number at distance cutoff of 0.05 and our method works well from a  
50 50 bp region to 160 bp region in V4. Subfigure C tests our unsupervised method on multiple  
51 hyper-variable regions (V2, V3, V4, V5, V6, V8) with region size of 120 bp (circle) and 80 bp  
52 (triangle). Panel “Mapped read number” in C shows the number of reads mapped to each chosen  
53 region. Panel “OTU number” in C shows the number of OTUs in each region at distance cutoff of  
54 0.05. All regions have consistent mapped read number and OTUs except V3.

55  
56  
57  
58  
59  
60  
61  
62

63

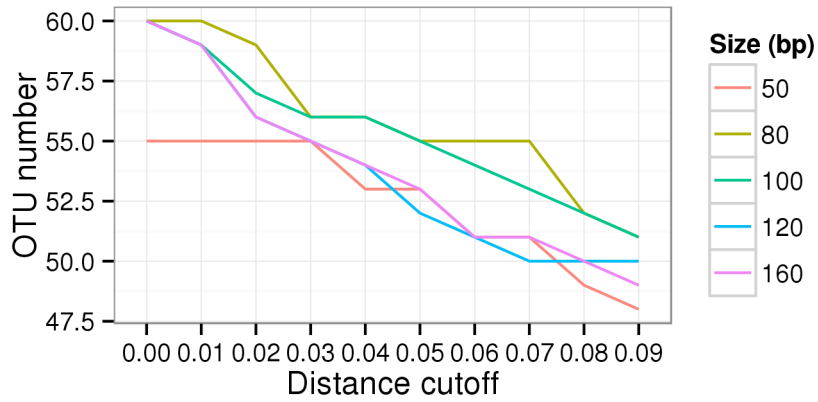

64

65 **FIG S3** Testing the effect of target region size on V4 of full-length SSU rRNA genes from a  
66 synthetic community with 64 species.

67

68

69

70

71

72

73

74

75

76

77

78

79

80

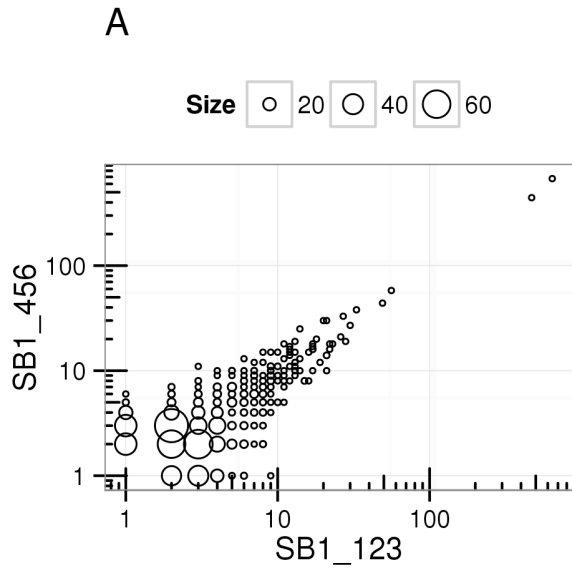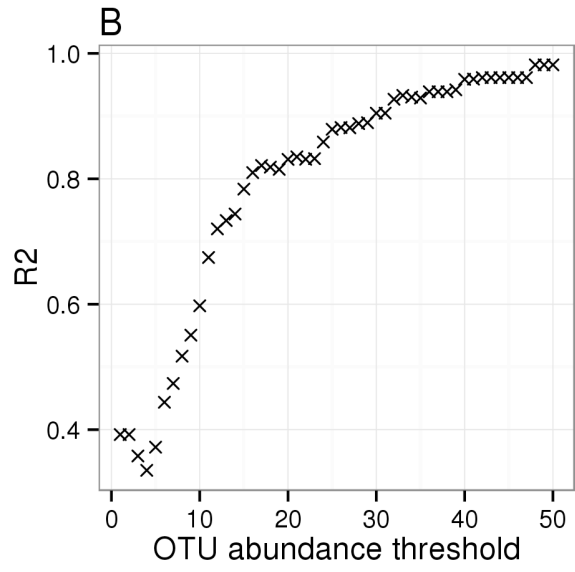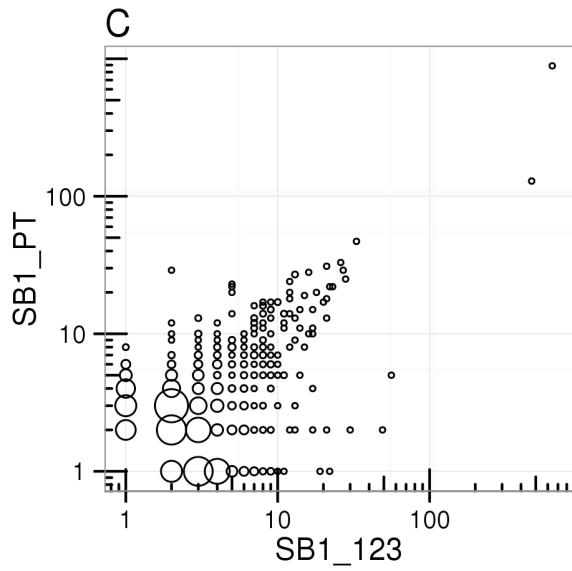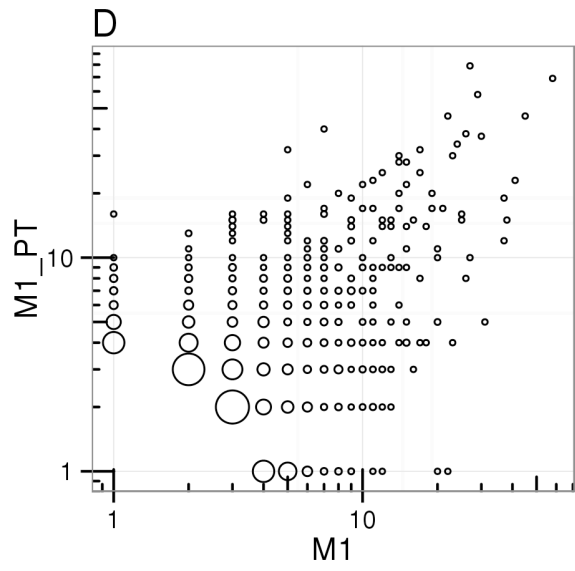

83 **FIG S4** Technical reproducibility test of our unsupervised clustering and comparison of OTU  
84 abundances between paired shotgun and amplicon data. Subfigure A shows consistent OTU  
85 abundance profiles in two technical replicates (Pearson's correlation coefficient is 0.997). X axis  
86 shows number of reads in each OTU in replicate SB1\_123, and y axis shows number of reads in  
87 each OTU in replicate SB1\_456. The size of circle is proportional to number of OTUs at the  
88 same location in the plot (with the same counts in SB1\_123 and also in SB1\_456). The  
89 consistency of counts of each OTU in two replicates becomes better when the abundance of  
90 OTUs are higher. Subfigure B shows progressive dropout analysis of two technical replicates of  
91 shotgun data. There is significant correlation of counts of each OTU between technical replicates;  
92 X axis is the threshold of OTU abundance and y axis is the  $R^2$  of linear regression of log  
93 transformed OTU abundances in two replicates. OTUs with lower abundance than the thresholds  
94 (x axis) were discarded before regression analysis. Subfigure C and D shows comparison of OTU  
95 abundance profile between paired shotgun and amplicon data in bulk soil sample (SB1) and  
96 rhizosphere sample (M1), respectively. There is inconsistency between shotgun data and  
97 amplicon data in both samples. X axis shows number of SSU rRNA gene fragments in shotgun  
98 data per OTU in log scale, and y axis shows number of amplicon sequences in each OTU in log  
99 scale. The OTU abundance in both amplicon and shotgun data were increased by 1 to avoid 0  
100 counts that can be displaced in log scale. The size of circle is proportional to number of OTUs  
101 with the same abundance in both types of data. There are OTUs with significantly different  
102 abundances in the two types of data (circles deviate from diagonal line). Pearson's correlation  
103 between two types of data is 0.873 in SB1 and 0.581 in M1.

104

105



106

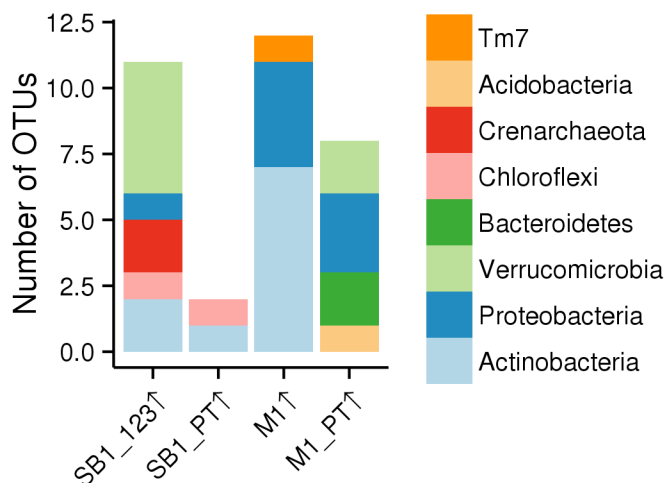

107

108 **FIG S5** Phyla of OTUs significantly different between shotgun data and amplicon data. SB1\_123  
109 are shotgun data and SB1\_PT are amplicon data both from the same DNA from bulk soil sample.  
110 M1 are shotgun data and M1\_PT are amplicon data both from the same DNA from Miscanthus  
111 rhizosphere sample. OTUs significantly different were defined as those with total abundance > 10  
112 and fold change between two types of data > 5 or < 0.2. Verrucomicrobia was biased against in  
113 bulk soil sample amplified by V6-V8 primer (SB1\_PT) but biased for in rhizosphere sample  
114 amplified with V4 primer (M1\_PT). Actinobacteria was biased against in rhizosphere sample  
115 (M1).

116

117

118

119

120

121

122

123

124

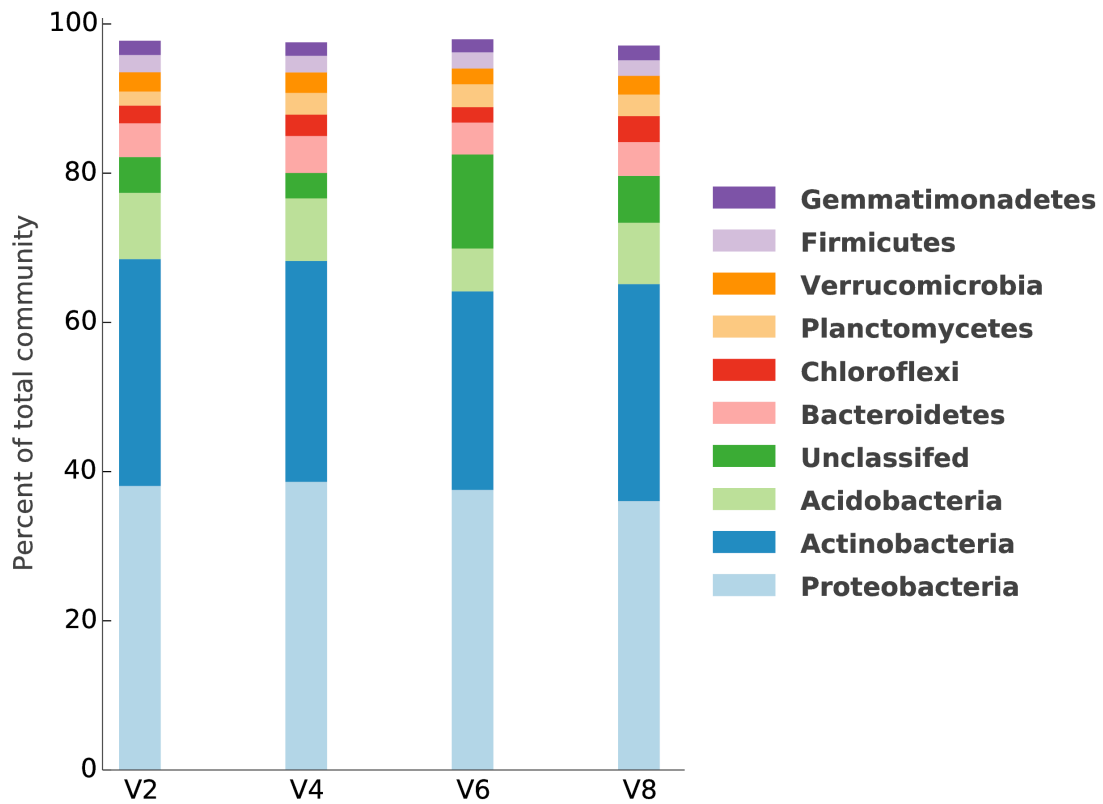

125

126 **FIG S6** Bacterial phylum profile comparison using different variable regions. Different variable  
127 regions have similar taxonomy profiles, except that V6 has more unclassified sequences. The  
128 minimum Pearson's correlation between the regions is 0.96. Classifications were done using SSU  
129 rRNA gene fragments from *Miscanthus* rhizosphere soil sample (M1) and SILVA database as  
130 reference.

131

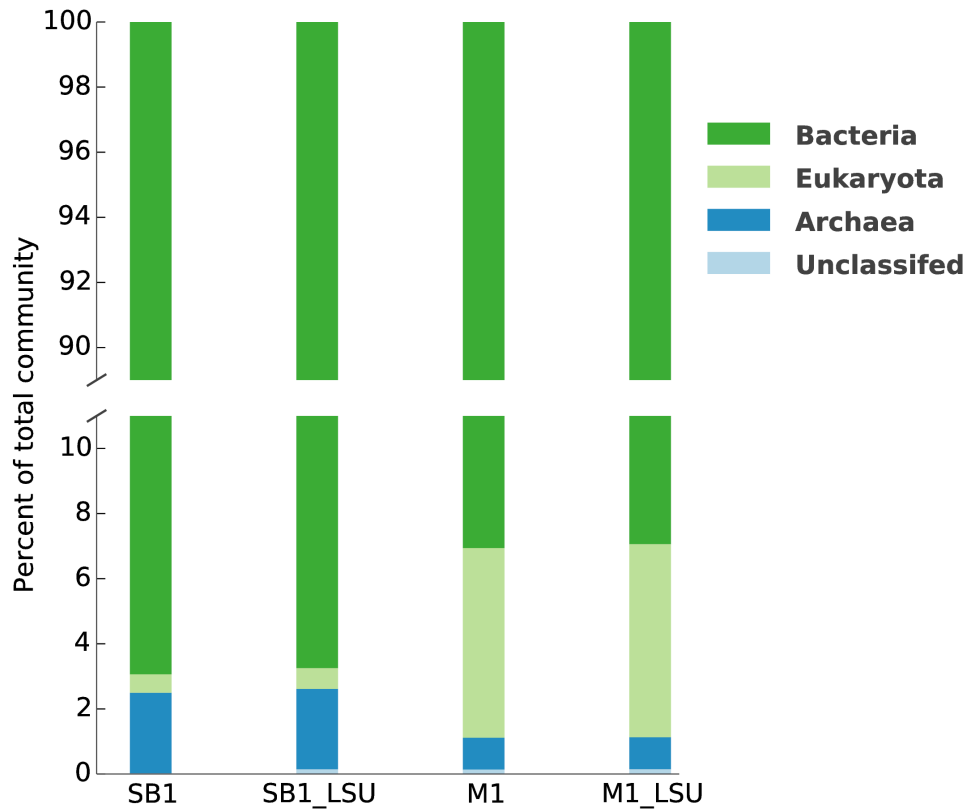

132

133 **FIG S7** Taxonomy profile comparison at domain level using SSU and LSU rRNA genes. For  
 134 both the bulk soil sample (SB1) and rhizosphere sample (M1), SSU and LSU show consistent  
 135 domain level taxonomy distribution (Pearson’s correlation coefficient = 1). “\_LSU” indicates  
 136 taxonomy from LSU rRNA SILVA database and the rest are classified by SSU rRNA database.

137

138

139

140

141

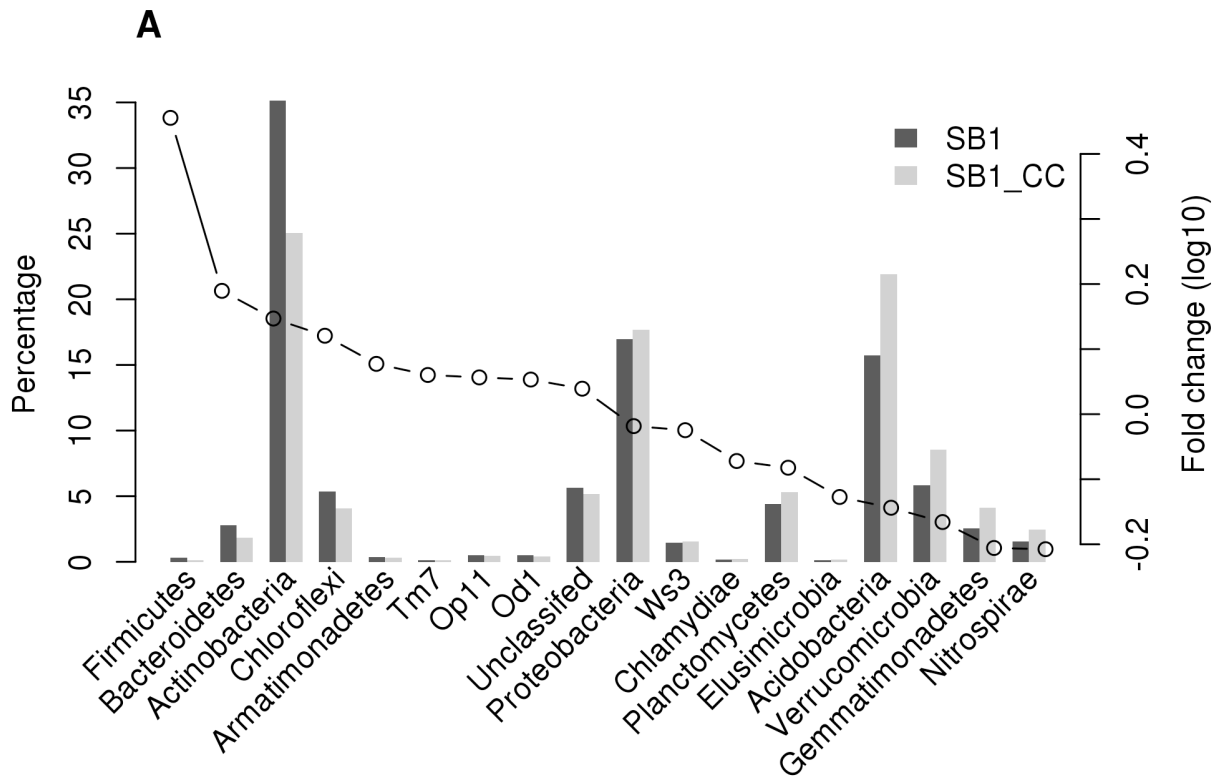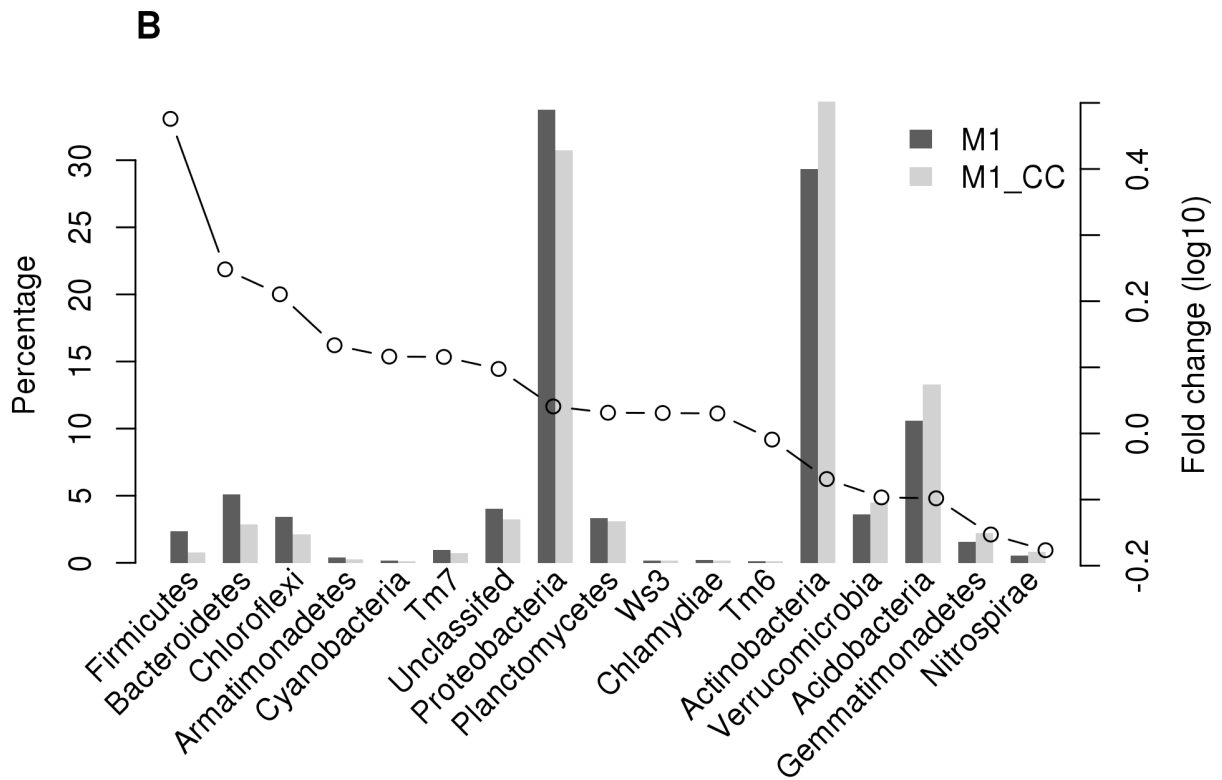

143 **FIG S8** Bacterial phylum level taxonomy summary before and after SSU rRNA gene copy  
144 correction. Left vertical axis with bar plot shows percentage in total community, while right  
145 vertical axis with line plot shows fold change after copy number correction. Taxa with relative  
146 abundances of more than 0.1% before copy correction were chosen and were ordered based on  
147 fold change. Subfigure A is for bulk soil sample (SB1) and B is for *Miscanthus* rhizosphere  
148 sample (M1).

149

150

151

152

153

154

155

156

157

158

159

160

161

162

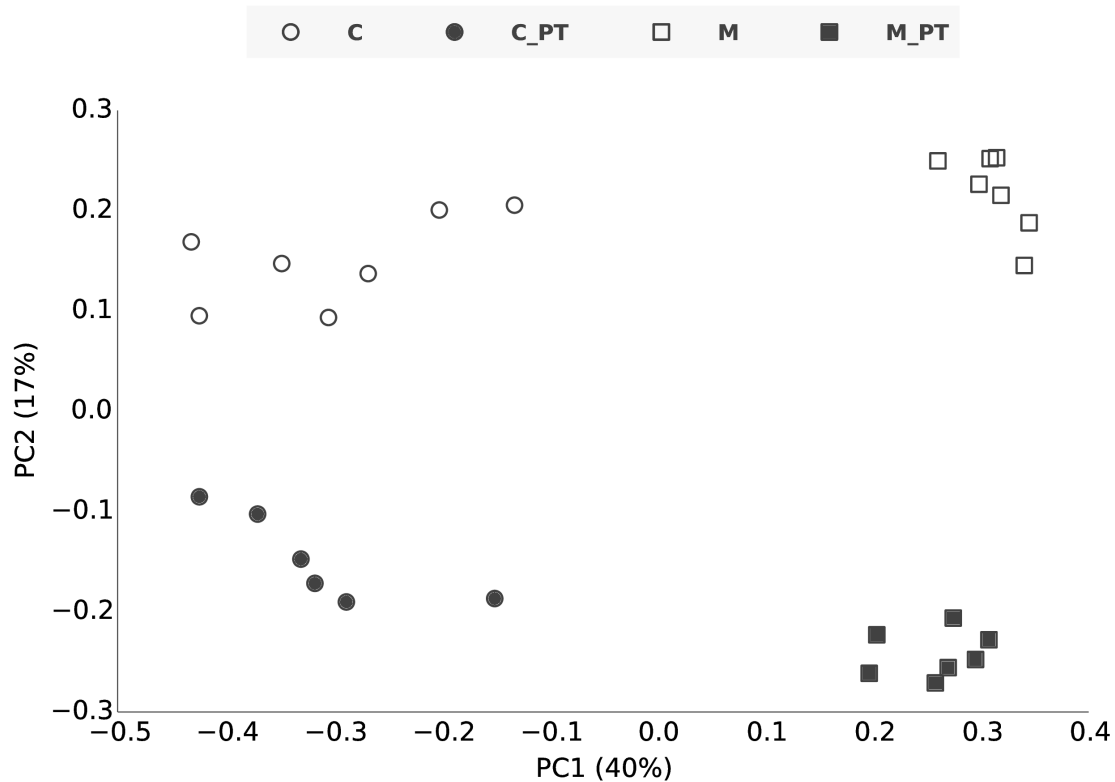

164

165 **FIG S9** Ordination plot of amplicon and shotgun derived data after copy correction. The plot is  
 166 similar to the one without copy correction (Fig. 3). There were significant differences in  
 167 amplicon and shotgun derived data (y-axis) and of corn and Miscanthus rhizosphere samples (x-  
 168 axis), (AMOVA p-value < 0.001), after copy number correction. PCoA was applied to OTU table  
 169 resulting from *de novo* clustering with shotgun data and amplicon data using 150bp of V4 region.  
 170 The filled markers (“\_PT”) are amplicon data and the unfilled markers are shotgun data.

171

172

173

174

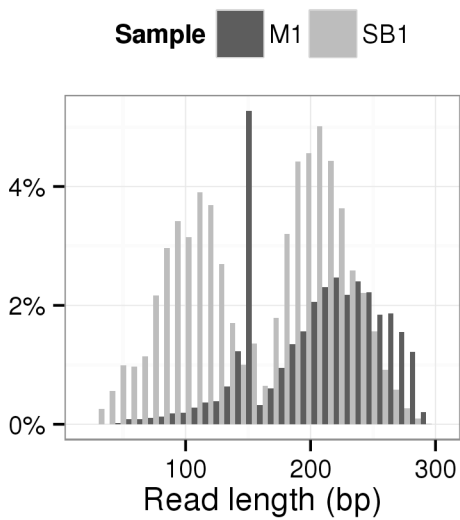

175

176 **FIG S10** Length distribution of trimmed reads after quality trimming and paired-end merging.  
177 SB1 is the bulk soil data and M1 is the rhizosphere data. The reads with >150 bp result from the  
178 merged paired ends, which benefits classification and clustering in downstream analyses. Reads  
179 less than 150 bp are also used in the analysis and come from unmerged paired reads.

180

181

182

183

184

185

186
